# Supplementary material
Source: ML conference proceedings conference paper supplement (https://proceedings.mlr.press/v33/dicker14.html)
Supplement: Supplementary file [file dicker14-supp.pdf]

---

# Supplementary material: Sparsity and the truncated $\ell^2$ -norm

---

**Lee H. Dicker**

Department of Statistics and Biostatistics  
Rutgers University  
ldicker@stat.rutgers.edu

## S1 PROOFS OF RESULTS FROM THE MAIN TEXT

### S1.1 Proof of Theorem 1

We require a basic lemma on soft-thresholding before proceeding with the proof of Theorem 1. Recall the soft-thresholding function  $s_\lambda(x) = \text{sign}(x)\{|x| - \lambda\} \vee 0$  ( $x \in \mathbb{R}$ ,  $\lambda \geq 0$ ) and define

$$r(\lambda; \theta) = E_\theta [\{s_\lambda(x) - \theta\}^2], \quad \theta \in \mathbb{R}, \lambda \geq 0$$

to be the risk of soft-thresholding in the 1-dimensional problem, where  $x \sim N(\theta, 1)$ . The following result is essentially contained in (Johnstone, 2013).

**Lemma S1.** *Let  $0 < \eta < 1$  and  $\lambda_\eta = \{2 \log(\eta^{-1})\}^{1/2}$ . Then*

$$r(\lambda_\eta; \theta) \leq \eta + [\theta^2 \wedge \{1 + 2 \log(\eta^{-1})\}] \leq \begin{cases} \eta + \{1 + 2 \log(\eta^{-1})\}^{1-p/2} |\theta|^p & \text{for all } 0 < p < 2, \\ \eta + \{1 + 2 \log(\eta^{-1})\} (\theta^2 \wedge 1). \end{cases} \quad (\text{S1})$$

*Proof of Lemma S1.* The first inequality in (S1) follows immediately from Equations (8.7) and (8.12) in (Johnstone, 2013). For  $0 < p < 2$ , we have

$$\theta^2 \wedge \{1 + 2 \log(\eta^{-1})\} = \{1 + 2 \log(\eta^{-1})\} \left[ \left\{ \frac{\theta^2}{1 + 2 \log(\eta^{-1})} \right\} \wedge 1 \right] \leq \{1 + 2 \log(\eta^{-1})\}^{1-p/2} |\theta|^p,$$

which yields the first part of the second inequality in (S1); the second part of the second inequality is obvious.  $\square$

Returning to the proof of Theorem 1, by (12) in the main text, it suffices to show that if  $n \rightarrow \infty$  and  $\eta \rightarrow 0$ , then

$$R\{\hat{\boldsymbol{\theta}}_{\lambda_\eta}; B_n^t(\eta)\} \lesssim 2\eta \log(\eta^{-1}). \quad (\text{S2})$$

Suppose that  $\boldsymbol{\theta} \in B_n^t(\eta)$ . Then, by Lemma S1,

$$R(\hat{\boldsymbol{\theta}}_{\lambda_\eta}; \boldsymbol{\theta}) = \frac{1}{n} \sum_{i=1}^n r(\lambda_\eta; \theta_i) \leq \eta + \{1 + 2 \log(\eta^{-1})\} \frac{1}{n} \|\boldsymbol{\theta}\|_t^2 \leq 2\eta \{1 + \log(\eta^{-1})\}. \quad (\text{S3})$$

The (asymptotic) inequality (S2) follows, which proves the theorem.

**S1.2 Proof of Theorem 2**

Suppose that  $\boldsymbol{\theta} \in \mathbb{R}^n$  and let  $\eta_t(\boldsymbol{\theta}) = n^{-1} \|\boldsymbol{\theta}\|_t^2$ . Then

$$\begin{aligned} R(\hat{\boldsymbol{\theta}}_{\hat{\lambda}}; \boldsymbol{\theta}) &= \frac{1}{n} E_{\boldsymbol{\theta}} \left\{ \|\hat{\boldsymbol{\theta}}_{\hat{\lambda}} - \hat{\boldsymbol{\theta}}_{\lambda_{\eta_t(\boldsymbol{\theta})}}\|^2 \right\} + \frac{1}{n} E_{\boldsymbol{\theta}} \left\{ \|\hat{\boldsymbol{\theta}}_{\lambda_{\eta_t(\boldsymbol{\theta})}} - \boldsymbol{\theta}\|^2 \right\} \\ &\quad + \frac{2}{n} E_{\boldsymbol{\theta}} \left[ \left\{ \hat{\boldsymbol{\theta}}_{\hat{\lambda}} - \hat{\boldsymbol{\theta}}_{\lambda_{\eta_t(\boldsymbol{\theta})}} \right\}^\top \left\{ \hat{\boldsymbol{\theta}}_{\lambda_{\eta_t(\boldsymbol{\theta})}} - \boldsymbol{\theta} \right\} \right] \\ &\leq I_1(\boldsymbol{\theta}) + I_2(\boldsymbol{\theta}) + 2\{I_1(\boldsymbol{\theta})I_2(\boldsymbol{\theta})\}^{1/2}, \end{aligned}$$

where

$$\begin{aligned} I_1(\boldsymbol{\theta}) &= \frac{1}{n} E_{\boldsymbol{\theta}} \left\{ \|\hat{\boldsymbol{\theta}}_{\hat{\lambda}} - \hat{\boldsymbol{\theta}}_{\lambda_{\eta_t(\boldsymbol{\theta})}}\|^2 \right\}, \\ I_2(\boldsymbol{\theta}) &= \frac{1}{n} E_{\boldsymbol{\theta}} \left\{ \|\hat{\boldsymbol{\theta}}_{\lambda_{\eta_t(\boldsymbol{\theta})}} - \boldsymbol{\theta}\|^2 \right\}. \end{aligned}$$

By Proposition 1 and Lemma S1,

$$\sup_{\boldsymbol{\theta} \in B_n^p(\eta)} I_2(\boldsymbol{\theta}) \lesssim \begin{cases} 2\eta \log(\eta^{-1}) & \text{if } p = t, \\ \eta \{2 \log(\eta^{-1})\}^{1-p/2} & \text{if } 0 \leq p < 2. \end{cases}$$

Thus, by Theorem 1 and (9)–(10) in the main text, it suffices to prove

$$\sup_{\boldsymbol{\theta} \in B_n^p(\eta)} I_1(\boldsymbol{\theta}) = O(\eta), \quad p \in [0, 2) \cup \{t\} \quad (\text{S4})$$

in order to prove Theorem 2.

Focusing on  $I_1(\boldsymbol{\theta})$ , we have the further decomposition,

$$I_1(\boldsymbol{\theta}) \leq J_1(\boldsymbol{\theta}) + J_2(\boldsymbol{\theta}) + 2\{J_1(\boldsymbol{\theta})J_2(\boldsymbol{\theta})\}^{1/2}, \quad (\text{S5})$$

where

$$\begin{aligned} J_1(\boldsymbol{\theta}) &= \frac{1}{n} E_{\boldsymbol{\theta}} \left\{ \|\hat{\boldsymbol{\theta}}_{\hat{\lambda}} - \hat{\boldsymbol{\theta}}_{\lambda_{\kappa_t(\boldsymbol{\theta})}}\|^2 \right\}, \\ J_2(\boldsymbol{\theta}) &= \frac{1}{n} E_{\boldsymbol{\theta}} \left\{ \|\hat{\boldsymbol{\theta}}_{\lambda_{\eta_t(\boldsymbol{\theta})}} - \hat{\boldsymbol{\theta}}_{\lambda_{\kappa_t(\boldsymbol{\theta})}}\|^2 \right\} \end{aligned}$$

and  $\kappa_t(\boldsymbol{\theta}) = 1 - n^{-1} \sum_{i=1}^n e^{-\theta_i^2/4}$ . The quantities  $J_1(\boldsymbol{\theta})$  and  $J_2(\boldsymbol{\theta})$  both involve the difference of soft-thresholding estimators. Consider the following basic property of the soft-thresholding function  $s_\lambda(x)$ : if  $0 \leq \lambda, \lambda'$  and  $x \in \mathbb{R}$ , then  $|s_\lambda(x) - s_{\lambda'}(x)| \leq |\lambda' - \lambda|$ ; if additionally  $x \leq \lambda \wedge \lambda'$ , then  $|s_\lambda(x) - s_{\lambda'}(x)| = 0$ . Now define the set  $A_{\boldsymbol{\theta}}(\rho) = \{i; |\theta_i| \geq \rho\}$ , for  $\rho \geq 0$ , and let  $A_{\boldsymbol{\theta}}^c(\rho) = \{1, \dots, n\} \setminus A_{\boldsymbol{\theta}}(\rho)$ . Define  $a_{\boldsymbol{\theta}}(\rho) = |A_{\boldsymbol{\theta}}(\rho)|$  to be the number of elements in the set  $A_{\boldsymbol{\theta}}(\rho)$ . Focusing on  $J_2(\boldsymbol{\theta})$  for the moment, we have

$$\begin{aligned} J_2(\boldsymbol{\theta}) &= \frac{1}{n} \sum_{i=1}^n E_{\boldsymbol{\theta}} \left[ \{s_{\lambda_{\eta_t(\boldsymbol{\theta})}}(x_i) - s_{\lambda_{\kappa_t(\boldsymbol{\theta})}}(x_i)\}^2 \right] \\ &= \frac{1}{n} \sum_{i \in A_{\boldsymbol{\theta}}(\rho)} E_{\boldsymbol{\theta}} \left[ \{s_{\lambda_{\eta_t(\boldsymbol{\theta})}}(x_i) - s_{\lambda_{\kappa_t(\boldsymbol{\theta})}}(x_i)\}^2 \right] + \frac{1}{n} \sum_{i \in A_{\boldsymbol{\theta}}^c(\rho)} E_{\boldsymbol{\theta}} \left[ \{s_{\lambda_{\eta_t(\boldsymbol{\theta})}}(x_i) - s_{\lambda_{\kappa_t(\boldsymbol{\theta})}}(x_i)\}^2 \right] \\ &\leq \{\lambda_{\eta_t(\boldsymbol{\theta})} - \lambda_{\kappa_t(\boldsymbol{\theta})}\}^2 \left[ \frac{a_{\boldsymbol{\theta}}(\rho)}{n} + \frac{1}{n} \sum_{i \in A_{\boldsymbol{\theta}}^c(\rho)} P_{\boldsymbol{\theta}}\{|x_i| \geq \lambda_{\eta_t(\boldsymbol{\theta})}\} \right] \\ &\leq 2 \left( \frac{3e+1}{e-1} \right)^2 \frac{1}{\log\{\eta_t(\boldsymbol{\theta})^{-1}\}} \left[ \frac{\eta_t(\boldsymbol{\theta})}{\rho^2 \wedge 1} + \frac{1}{n} \sum_{i \in A_{\boldsymbol{\theta}}^c(\rho)} P_{\boldsymbol{\theta}}\{|x_i| \geq \lambda_{\eta_t(\boldsymbol{\theta})}\} \right]. \end{aligned}$$

If  $0 < \rho < \lambda$  and  $i \in A_{\theta}^c(\rho)$ , then

$$P_{\theta}\{|x_i| \geq \lambda\} \leq \sqrt{\frac{2}{\pi}} \int_{\lambda-\rho}^{\infty} e^{-z^2/2} dz \leq \sqrt{\frac{2}{\pi}} \frac{e^{-\{\lambda-\rho\}^2/2}}{\lambda-\rho}. \quad (\text{S6})$$

Taking  $\lambda = \lambda_{\eta_t(\theta)}$  and  $\rho = \log\{\lambda_{\eta_t(\theta)}\}/\lambda_{\eta_t(\theta)}$  above, we obtain

$$J_2(\theta) \leq 2 \left( \frac{3e+1}{e-1} \right)^2 \frac{1}{\log\{\eta_t(\theta)^{-1}\}} \left[ \frac{\lambda_{\eta_t(\theta)}^2 \eta_t(\theta)}{\log\{\lambda_{\eta_t(\theta)}\}^2} + \sqrt{\frac{2}{\pi}} \frac{\eta_t(\theta) \lambda_{\eta_t(\theta)}}{\lambda_{\eta_t(\theta)} - \log\{\lambda_{\eta_t(\theta)}\}/\lambda_{\eta_t(\theta)}} \right] = O\{\eta_t(\theta)\}. \quad (\text{S7})$$

It remains to bound  $J_1(\theta)$ . The initial steps are similar to those for bounding  $J_2(\theta)$ , but now we must account for the fact that the thresholding level  $\hat{\lambda}$  is random:

$$\begin{aligned} J_1(\theta) &= \frac{1}{n} \sum_{i \in A_{\theta}(\rho)} E_{\theta} \left[ \{s_{\hat{\lambda}}(x_i) - s_{\lambda_{\kappa_t(\theta)}}(x_i)\}^2 \right] + \frac{1}{n} \sum_{i \in A_{\theta}^c(\rho)} E_{\theta} \left[ \{s_{\lambda_{\hat{\lambda}}}(x_i) - s_{\lambda_{\kappa_t(\theta)}}(x_i)\}^2 \right] \\ &\leq \frac{a_{\theta}(\rho)}{n} E_{\theta} \left[ \{\hat{\lambda} - \lambda_{\kappa_t(\theta)}\}^2 \right] + \frac{1}{n} \sum_{i \in A_{\theta}^c(\rho)} E_{\theta} \left[ \{\hat{\lambda} - \lambda_{\kappa_t(\theta)}\}^2; |x_i| \geq \hat{\lambda} \wedge \lambda_{\kappa_t(\theta)} \right] \\ &\leq \frac{\eta_t(\theta)}{\rho^2 \wedge 1} E_{\theta} \left[ \{\hat{\lambda} - \lambda_{\kappa_t(\theta)}\}^2 \right] + \frac{1}{n} \sum_{i \in A_{\theta}^c(\rho)} E_{\theta} \left[ \{\hat{\lambda} - \lambda_{\kappa_t(\theta)}\}^2; |x_i| \geq \hat{\lambda} \wedge \lambda_{\kappa_t(\theta)} \right]. \end{aligned}$$

By standard large deviations results,

$$E_{\theta} \left[ \{\hat{\lambda} - \lambda_{\kappa_t(\theta)}\}^2 \right] \leq \frac{2}{\log\{\kappa_t(\theta)^{-1}\}} E_{\theta} \left[ \log\{(\hat{\kappa}_t \vee n^{-1})/\kappa_t(\theta)\}^2 \right] = O \left[ \frac{1}{n \kappa_t(\theta)^2 \log\{\kappa_t(\theta)^{-1}\}} \right].$$

Thus, it follows that

$$J_1(\theta) \leq \frac{1}{n} \sum_{i \in A_{\theta}^c(\rho)} E_{\theta} \left[ \{\hat{\lambda} - \lambda_{\kappa_t(\theta)}\}^2; |x_i| \geq \hat{\lambda} \wedge \lambda_{\kappa_t(\theta)} \right] + O \left[ \frac{1}{(\rho^2 \wedge 1) n \kappa_t(\theta) \log\{\kappa_t(\theta)^{-1}\}} \right] \quad (\text{S8})$$

Now fix  $c_1, c_2 > 0$ . Then

$$\begin{aligned} E_{\theta} \left[ \{\hat{\lambda} - \lambda_{\kappa_t(\theta)}\}^2; |x_i| \geq \hat{\lambda} \wedge \lambda_{\kappa_t(\theta)} \right] &\leq E_{\theta} \left[ \{\hat{\lambda} - \lambda_{\kappa_t(\theta)}\}^2; |x_i| \geq \hat{\lambda} \wedge \lambda_{\kappa_t(\theta)}, \hat{\kappa}_t \leq \kappa_t(\theta) - c_1 \right] \\ &\quad + E_{\theta} \left[ \{\hat{\lambda} - \lambda_{\kappa_t(\theta)}\}^2; |x_i| \geq \hat{\lambda} \wedge \lambda_{\kappa_t(\theta)}, \kappa_t(\theta) - c_1 < \hat{\kappa}_t \leq \kappa_t(\theta) \right] \\ &\quad + E_{\theta} \left[ \{\hat{\lambda} - \lambda_{\kappa_t(\theta)}\}^2; |x_i| \geq \hat{\lambda} \wedge \lambda_{\kappa_t(\theta)}, \kappa_t(\theta) < \hat{\kappa}_t \leq \kappa_t(\theta) + c_2 \right] \\ &\quad + E_{\theta} \left[ \{\hat{\lambda} - \lambda_{\kappa_t(\theta)}\}^2; |x_i| \geq \hat{\lambda} \wedge \lambda_{\kappa_t(\theta)}, \kappa_t(\theta) + c_2 < \hat{\kappa}_t \right] \\ &\leq \lambda_{\text{univ}}^2 P_{\theta} \{ \hat{\kappa}_t \leq \kappa_t(\theta) - c_1 \} \\ &\quad + \{ \lambda_{\kappa_t(\theta) - c_1} - \lambda_{\kappa_t(\theta)} \}^2 P_{\theta} \{ |x_i| \geq \lambda_{\kappa_t(\theta)} \} \\ &\quad + \{ \lambda_{\kappa_t(\theta)} - \lambda_{\kappa_t(\theta) + c_2} \}^2 P_{\theta} \{ |x_i| \geq \lambda_{\kappa_t(\theta) + c_2} \} \\ &\quad + \lambda_{\kappa_t(\theta)}^2 P_{\theta} \{ \kappa_t(\theta) + c_2 < \hat{\kappa}_t \} \\ &\leq \lambda_{\text{univ}}^2 P_{\theta} \{ \hat{\kappa}_t \leq \kappa_t(\theta) - c_1 \} \\ &\quad + \frac{2c_1^2}{\{\kappa_t(\theta) - c_1\}^2 \log\{\kappa_t(\theta)^{-1}\}} P_{\theta} \{ |x_i| \geq \lambda_{\kappa_t(\theta)} \} \\ &\quad + \frac{2c_2^2}{\kappa_t(\theta)^2 \log\{\kappa_t(\theta)^{-1}\}} P_{\theta} \{ |x_i| \geq \lambda_{\kappa_t(\theta) + c_2} \} \\ &\quad + \lambda_{\kappa_t(\theta)}^2 P_{\theta} \{ \kappa_t(\theta) + c_2 < \hat{\kappa}_t \}. \end{aligned}$$

Now take  $c_1 = c_2 = \{\log(n)/n\}^{1/2}$  and assume that  $i \in A_{\theta}^c(\rho)$ , with  $\rho = \log\{\lambda_{\kappa_t(\theta) + c_2}\}/\lambda_{\kappa_t(\theta) + c_2}$ . Then, by (S6),

$$P_{\theta} \{ |x_i| \geq \lambda_{\kappa_t(\theta) + c_2} \} = O \{ \eta_t(\theta) \}$$

and we conclude that

$$E_{\boldsymbol{\theta}} \left[ \{\hat{\lambda} - \lambda_{\kappa_t(\boldsymbol{\theta})}\}^2; |x_i| \geq \hat{\lambda} \wedge \lambda_{\kappa_t(\boldsymbol{\theta})} \right] \leq O\{\eta_t(\boldsymbol{\theta})\}$$

Hence, combining this with (S8) implies

$$J_1(\boldsymbol{\theta}) = O\{\eta_t(\boldsymbol{\theta})\}. \quad (\text{S9})$$

Finally, (S5), (S7), and (S9) together imply (S4), which proves the theorem.

### S1.3 Proof of Theorem 3

Let

$$h(x) = \int_{-\infty}^{\infty} \phi(x - \theta) d\pi(\theta),$$

where  $\phi(x)$  is the standard normal density. By Brown's identity (Brown, 1971; Bickel, 1981), the Bayes risk  $r(\pi)$  satisfies

$$r(\pi) = 1 - \int_{-\infty}^{\infty} \frac{\{h'(x)\}^2}{h(x)} dx.$$

Since

$$h'(x) = - \int_{-\infty}^{\infty} (x - \theta) \phi(x - \theta) d\pi(\theta)$$

and

$$\int_{-\infty}^{\infty} \int_{-\infty}^{\infty} (x - \theta)^2 \phi(x - \theta) d\pi(\boldsymbol{\theta}) dx = 1,$$

it follows that

$$r(\pi) = \int_{-\infty}^{\infty} \frac{1}{h(x)} \left[ \int_{-\infty}^{\infty} \phi(x - \theta) d\pi(\theta) \int_{-\infty}^{\infty} (x - \theta)^2 \phi(x - \theta) d\pi(\theta) - \left\{ \int_{-\infty}^{\infty} (x - \theta) \phi(x - \theta) d\pi(\theta) \right\}^2 \right] dx.$$

By Jensen's inequality,

$$\int_{-\infty}^{\infty} \phi(x - \theta) d\pi(\theta) \int_{-\infty}^{\infty} (x - \theta)^2 \phi(x - \theta) d\pi(\theta) \geq \left\{ \int_{-\infty}^{\infty} (x - \theta) \phi(x - \theta) d\pi(\theta) \right\}^2, \quad x \in \mathbb{R}.$$

Thus,

$$\begin{aligned} r(\pi) &\geq \sqrt{2\pi} \int_{-\infty}^{\infty} \left[ \int_{-\infty}^{\infty} \phi(x - \theta) d\pi(\theta) \int_{-\infty}^{\infty} (x - \theta)^2 \phi(x - \theta) d\pi(\theta) - \left\{ \int_{-\infty}^{\infty} (x - \theta) \phi(x - \theta) d\pi(\theta) \right\}^2 \right] dx \\ &= \sqrt{2\pi} \int_{-\infty}^{\infty} \int_{-\infty}^{\infty} \int_{-\infty}^{\infty} \{(x - \theta_1)^2 - (x - \theta_1)(x - \theta_2)\} \phi(x - \theta_1) \phi(x - \theta_2) dx d\pi(\theta_1) d\pi(\theta_2). \end{aligned}$$

The inner integral above is

$$\int_{-\infty}^{\infty} \{(x - \theta_1)^2 - (x - \theta_1)(x - \theta_2)\} \phi(x - \theta_1) \phi(x - \theta_2) dx = \frac{1}{4\sqrt{\pi}} (\theta_1 - \theta_2)^2 e^{-(\theta_1 - \theta_2)^2/4},$$

which implies that

$$r(\pi) \geq \frac{1}{2\sqrt{2}} \int_{-\infty}^{\infty} \int_{-\infty}^{\infty} (\theta_1 - \theta_2)^2 e^{-(\theta_1 - \theta_2)^2/4} d\pi(\theta_1) d\pi(\theta_2) = \frac{1}{2\sqrt{2}} E \left( S e^{-S/4} \right), \quad (\text{S10})$$

where the random variable  $S$  has the same distribution as  $(\theta_1 - \theta_2)^2$ , under the assumption that  $\theta_1, \theta_2 \sim \pi$  are independent.

Now we work to lower bound  $E(S e^{-S/4})$ . Since the function  $t \mapsto t e^{-t/4}$  is convex on  $[8, \infty)$ , Jensen's inequality implies that

$$E \left( S e^{-S/4} \right) = E \left( S e^{-S/4} \mid S \leq 8 \right) P(S \leq 8) + E \left( S e^{-S/4} \mid S > 8 \right) P(S > 8)$$

$$\geq e^{-2}E(S; S \leq 8) + E(S; S > 8)e^{-E(S|S>8)/4}.$$

Dividing the analysis into two case, first suppose that  $E(S; S \leq 8) \geq 8P(S > 8)$ . Then

$$E\left(Se^{-S/4}\right) \geq e^{-2}E(S; S \leq 8) \geq \frac{1}{2e^2} \{E(S; S \leq 8) + 8P(S > 8)\} = \frac{1}{2e^2}E(S \wedge 8).$$

Furthermore, since  $\pi$  is symmetric,

$$\begin{aligned} E(S \wedge 8) &= \int_{\mathbb{R}^2} (\theta_1 - \theta_2)^2 \wedge 8 \, d\pi(\theta_1) \, d\pi(\theta_2) \\ &\geq \int_{\theta_1 \geq 0, \theta_2 \leq 0} (\theta_1 - \theta_2)^2 \wedge 8 \, d\pi(\theta_1) \, d\pi(\theta_2) + \int_{\theta_1 \leq 0, \theta_2 \geq 0} (\theta_1 - \theta_2)^2 \wedge 8 \, d\pi(\theta_1) \, d\pi(\theta_2) \\ &\geq 2 \int_{\theta_1 \geq 0, \theta_2 \leq 0} (\theta_1^2 + \theta_2^2) \wedge 8 \, d\pi(\theta_1) \, d\pi(\theta_2) \\ &\geq 4 \int_{\theta_1 \geq 0, \theta_2 \leq 0} \theta_1^2 \wedge 4 \, d\pi(\theta_1) \, d\pi(\theta_2) \\ &\geq \int_{\mathbb{R}} \theta_1^2 \wedge 4 \, d\pi(\theta_1) \\ &\geq \int_{\mathbb{R}} \theta_1^2 \wedge 1 \, d\pi(\theta_1) \\ &= \eta_t(\pi). \end{aligned}$$

Thus,

$$E\left(Se^{-S/4}\right) \geq \frac{1}{2e^2}\eta_t(\pi). \tag{S11}$$

Now suppose that  $E(S; S \leq 8) < 8P(S > 8)$ . Then

$$E(S|S > 8) = \frac{E(S; S > 8)}{P(S > 8)} \leq \frac{16E(S)}{E(S \wedge 8)} \leq \frac{32\eta_2(\pi)}{\eta_t(\pi)}.$$

We conclude that

$$E\left(Se^{-S/4}\right) \geq E(S)e^{-E(S|S>8)/4} \geq 2\eta_2(\pi)e^{-8\eta_2(\pi)/\eta_t(\pi)}. \tag{S12}$$

The theorem follows from (S10)–(S12).

#### S1.4 Proof of Proposition 1

For  $p = 0$ , the result follows immediately from (S3), with  $\eta_t(\boldsymbol{\theta})$  in place of  $\eta$ , and the fact that  $\|\boldsymbol{\theta}\|_t^2 \leq \|\boldsymbol{\theta}\|_0$ . Suppose that  $0 < p < 2$  and  $\boldsymbol{\theta} \in B_n^p(\eta)$ . Let  $\eta_t(\boldsymbol{\theta}) = n^{-1}\|\boldsymbol{\theta}\|_t^2$  and  $\eta_p(\boldsymbol{\theta}) = n^{-1}\|\boldsymbol{\theta}\|_p^p$ . By Lemma S1,

$$\begin{aligned} R\{\hat{\boldsymbol{\theta}}_{\lambda_{\eta_t(\boldsymbol{\theta})}}; \boldsymbol{\theta}\} &= \frac{1}{n} \sum_{i=1}^n r\{\lambda_{\eta_t(\boldsymbol{\theta})}, \theta_i\} \\ &\leq \eta_t(\boldsymbol{\theta}) + [1 + 2 \log\{\eta_t(\boldsymbol{\theta})^{-1}\}] \eta_t(\boldsymbol{\theta})\gamma_p(\boldsymbol{\theta}) \\ &\leq \eta + [1 + 2 \log\{\eta_t(\boldsymbol{\theta})^{-1}\}] \eta_t(\boldsymbol{\theta})\gamma_p(\boldsymbol{\theta}), \end{aligned}$$

where

$$\gamma_p(\boldsymbol{\theta}) = \left( \frac{\eta_p(\boldsymbol{\theta})}{[1 + 2 \log\{\eta_t(\boldsymbol{\theta})^{-1}\}]^{p/2} \eta_t(\boldsymbol{\theta})} \right) \wedge 1.$$

It is straightforward to check that if  $\eta \rightarrow 0$ , then

$$\sup_{\boldsymbol{\theta} \in B_n^p(\eta)} [1 + 2 \log\{\eta_t(\boldsymbol{\theta})^{-1}\}] \eta_t(\boldsymbol{\theta})\gamma_p(\boldsymbol{\theta}) \lesssim \eta\{2 \log(\eta^{-1})\}^{1-p/2}.$$

The proposition follows.

## References

- BICKEL, P. J. (1981). Minimax estimation of the mean of a normal distribution when the parameter space is restricted. *Ann. Stat.* **9** 1301–1309.
- BROWN, L. D. (1971). Admissible estimators, recurrent diffusions, and insoluble boundary value problems. *Ann. Math. Stat.* **42** 855–903.
- JOHNSTONE, I. M. (2013). *Gaussian Estimation: Sequence and Wavelet Models*. Monograph. Available at <http://www-stat.stanford.edu/~imj/GE06-11-13.pdf>.
